# Supplementary material
Source: PubMed Central journal article supplement (PMC4217465)
Supplement: pnas.201411215SI.pdf [file pnas.201411215SI.pdf]

# Supporting Information

van der Meer et al. 10.1073/pnas.1411215111

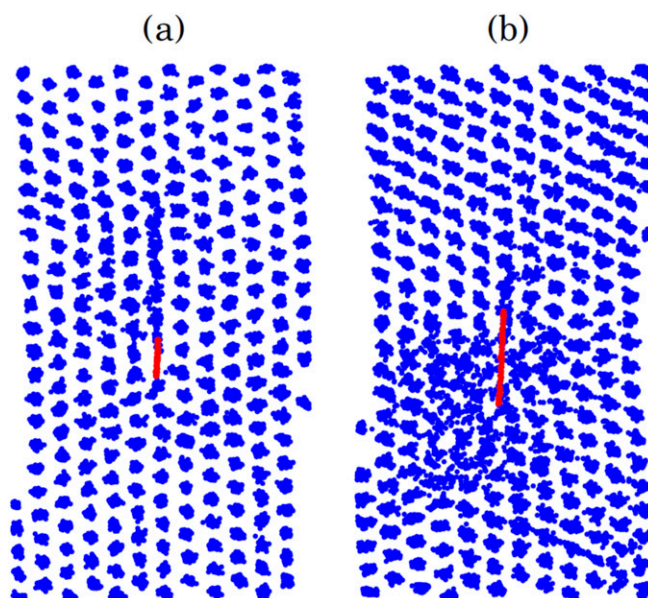

**Fig. S1.** Experimental particle trajectories (blue) at two different perturbation amplitudes  $A$  (red) showing two distinct responses. (A) For small perturbations  $A = 4.9 \mu\text{m}$  ( $\gamma_L = 0.5$ ), the crystal responds elastically, whereas (B) for higher perturbation amplitudes  $A = 12.0 \mu\text{m}$  ( $\gamma_L = 1.2$ ), plastic deformation is observed. Lattice spacings:  $a \approx 6.3 \mu\text{m}$ .

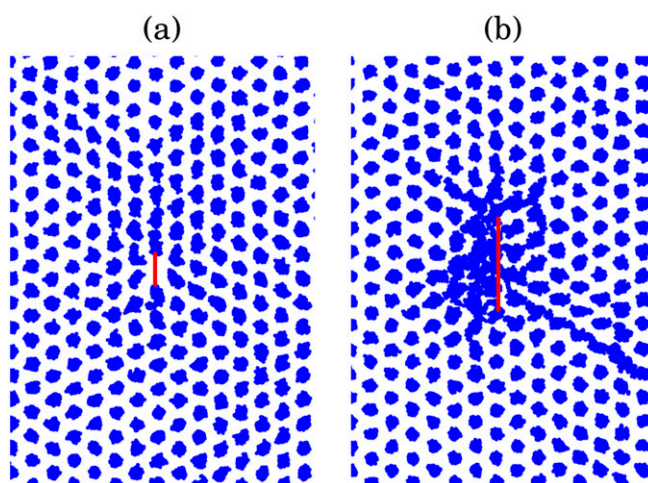

**Fig. S2.** Simulated particle trajectories (blue) at two different perturbation amplitudes  $A$  (red) showing two distinct responses. (A) For small perturbations  $A = 4.0 \mu\text{m}$  ( $\gamma_L = 0.4$ ), the crystal responds elastically, whereas (B) for higher perturbation amplitudes  $A = 12.0 \mu\text{m}$  ( $\gamma_L = 1.2$ ), plastic deformation is observed. Lattice spacings:  $a \approx 6.3 \mu\text{m}$ .





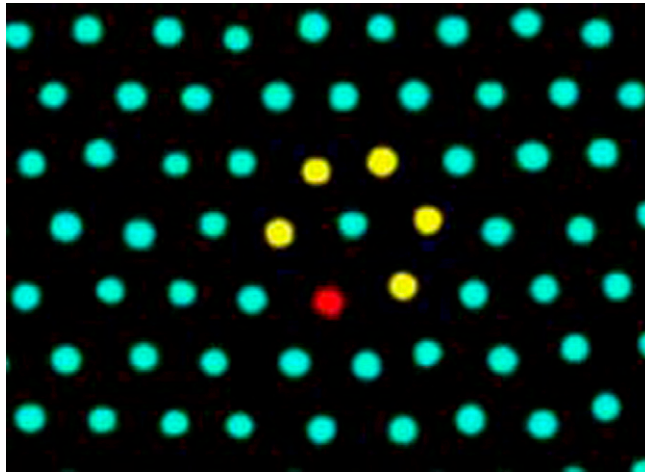

**Movie S1.** Color-coded bright-field images showing a closed rearrangement loop on the excitation of a single particle. When the trapped particle (red) is driven along one of the crystal axis, other undriven particles start to move cooperatively in a ring-like fashion (yellow). Video sped up by a factor 10.

[Movie S1](#)

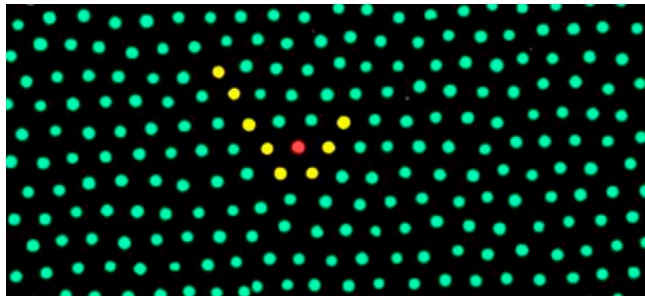

**Movie S2.** Color-coded bright-field images showing an open-ended rearrangement string that grows from both head and tail on the excitation of a single particle. When the trapped particle (red) is driven along one of the crystal axis, other undriven particles start to move cooperatively as well (yellow). Video sped up by a factor 10.

[Movie S2](#)

1-5144s

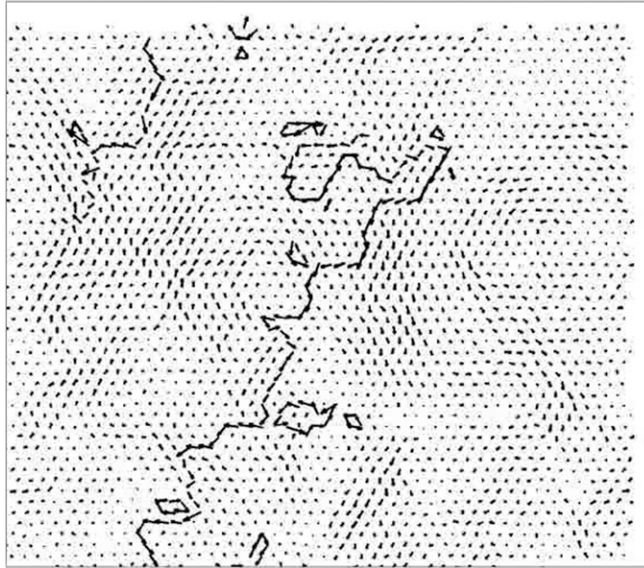

**Movie S3.** Brownian dynamics simulations showing a spontaneous string of rearrangements occurring through thermal excitation alone. The arrows indicate the displacement of particles with respect to their original lattice positions.

[Movie S3](#)
